# Supplementary material for: Electrochemical Iodination through the In Situ Generation of Iodinating Agents: A Promising Green Approach
Source: MDPI journal article supplement (doi:10.3390/molecules28145555), 2023-07-20
Supplement: s1 [file s1]

# Electrochemical Iodination through the In Situ Generation of Iodinating Agents: A Promising Green Approach

Letizia Sorti <sup>1</sup>, Fiammetta Vitulano <sup>1</sup>, Elia Cappellini <sup>1</sup>, Fulvio Uggeri <sup>2</sup>, Carlo Francesco Morelli <sup>1</sup>, Guido Sello <sup>1</sup>, Alessandro Minguzzi <sup>1,3\*</sup>, Alberto Vertova <sup>1,3</sup>

## Adresses

<sup>1</sup> Laboratory of Applied Electrochemistry, Dipartimento di Chimica, Università degli Studi di Milano, via Golgi, 19, 20133, Milano, Italy

<sup>2</sup> Bracco SpA, via Caduti di Marcinelle, 13, 20134, Milano, Italy

<sup>3</sup> Consorzio Interuniversitario Nazionale per la Scienza e Tecnologia dei Materiali – INSTM. Via G. Giusti 9, 50121, Firenze, Italy

\*Corresponding Author [alessandro.minguzzi@unimi.it](mailto:alessandro.minguzzi@unimi.it)

## Supplementary Materials:

**S1:** Data for the identification of 2A and 3A reactions.

List of the possible reaction to which anodic peaks 2A and 3A could be assigned.

|    |                                                         |                                              |       |
|----|---------------------------------------------------------|----------------------------------------------|-------|
| 2A | $I_2 + 2 H_2O \rightarrow 2HIO + 2H^+ + 2e^-$           | $E_{vs SHE} (V) = 1.354 - 0.0591 \text{ pH}$ | (S1)  |
|    | $I^- + H_2O \rightarrow HIO + H^+ + 2e^-$               | $E_{vs SHE} (V) = 0.987 - 0.0295 \text{ pH}$ | (S2)  |
|    | $I_3^- + 3 H_2O \rightarrow 3HIO + 3H^+ + 4 e^-$        | $E_{vs SHE} (V) = 1.213 - 0.0443 \text{ pH}$ | (S3)  |
| 3A | $HIO + 2 H_2O \rightarrow IO_3^- + 5 H^+ + 4 e^-$       | $E_{vs SHE} (V) = 1.134 - 0.0739 \text{ pH}$ | (S4)  |
|    | $IO^- + 2 H_2O \rightarrow IO_3^- + 4 H^+ + 4 e^-$      | $E_{vs SHE} (V) = 0.972 - 0.0591 \text{ pH}$ | (S5)  |
|    | $I_3^- + 9 H_2O \rightarrow 3 HIO_3 + 15 H^+ + 16 e^-$  | $E_{vs SHE} (V) = 1.145 - 0.0554 \text{ pH}$ | (S6)  |
|    | $I_3^- + 9 H_2O \rightarrow 3 IO_3^- + 18 H^+ + 16 e^-$ | $E_{vs SHE} (V) = 1.154 - 0.0665 \text{ pH}$ | (S7)  |
|    | $I_2 + 6 H_2O \rightarrow 2 HIO_3 + 10 H^+ + 10 e^-$    | $E_{vs SHE} (V) = 1.169 - 0.0591 \text{ pH}$ | (S8)  |
|    | $I_2 + 6 H_2O \rightarrow 2 IO_3^- + 12 H^+ + 10 e^-$   | $E_{vs SHE} (V) = 1.178 - 0.0709 \text{ pH}$ | (S9)  |
|    | $I^- + 3 H_2O \rightarrow HIO_3 + 5 H^+ + 6 e^-$        | $E_{vs SHE} (V) = 1.077 - 0.0493 \text{ pH}$ | (S10) |
|    | $I^- + 3 H_2O \rightarrow IO_3^- + 6 H^+ + 6 e^-$       | $E_{vs SHE} (V) = 1.085 - 0.0591 \text{ pH}$ | (S11) |

**Figure S1** and **Table S1** reporting the experimental linear dependencies on pH of first, second and third oxidation peak reported in **Figure 2a)** of KI 2 mM on a GC electrode.

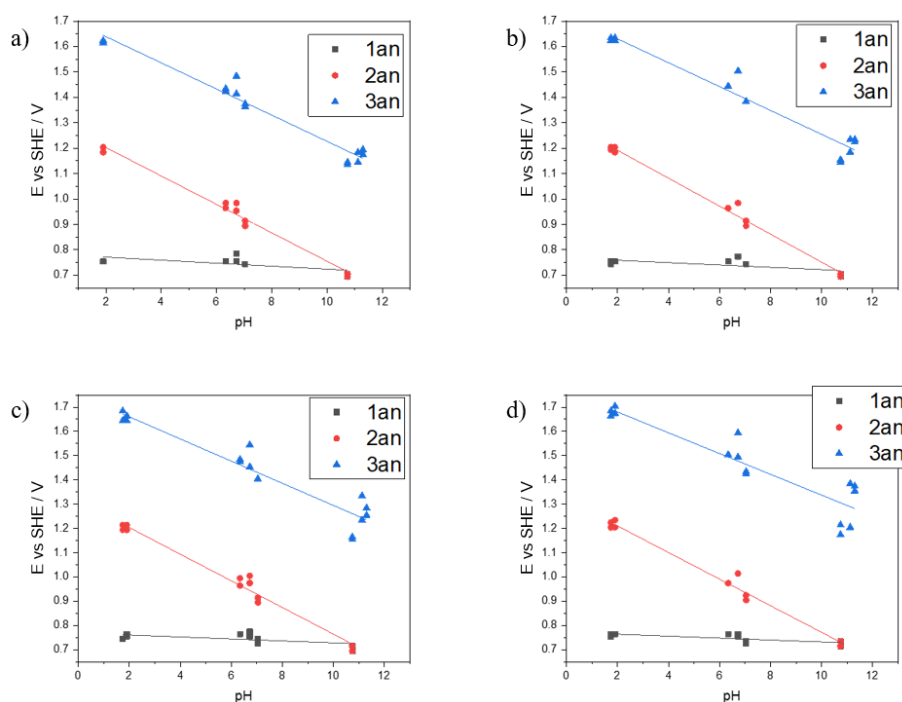

**Figure S1:** Plots potential ( $E$ ) vs pH of anodic peak at a) 10, b) 20, c) 50 and d) 100  $\text{mV s}^{-1}$ . WE = GC, RE = SCE, CE = Pt, electrolyte = phosphate buffer solution 0.5 M at various pH, analyte = KI 2 mM.

**Table S1:** Values of intercepts and slopes obtained from plot  $E$  vs pH for each oxidation peak at each scan rate.

| 10 mV/s |                    |                    | 20 mV/s  |                    |                    |
|---------|--------------------|--------------------|----------|--------------------|--------------------|
| Peak    | Intercept (vs SHE) | Slope              | Peak     | Intercept (vs SHE) | Slope              |
| 1A      | $0.78 \pm 0.02$    | $-0.006 \pm 0.002$ | 1A       | $0.76 \pm 0.01$    | $-0.005 \pm 0.002$ |
| 2A      | $1.31 \pm 0.02$    | $-0.056 \pm 0.003$ | 2A       | $1.30 \pm 0.01$    | $-0.055 \pm 0.002$ |
| 3A      | $1.74 \pm 0.03$    | $-0.051 \pm 0.003$ | 3A       | $1.72 \pm 0.03$    | $-0.047 \pm 0.003$ |
| 50 mV/s |                    |                    | 100 mV/s |                    |                    |
| Peak    | Intercept (vs SHE) | Slope              | Peak     | Intercept (vs SHE) | Slope              |
| 1A      | $0.77 \pm 0.01$    | $-0.004 \pm 0.002$ | 1A       | $0.77 \pm 0.01$    | $-0.004 \pm 0.001$ |
| 2A      | $1.31 \pm 0.02$    | $-0.055 \pm 0.003$ | 2A       | $1.32 \pm 0.02$    | $-0.055 \pm 0.003$ |
| 3A      | $1.75 \pm 0.03$    | $-0.046 \pm 0.004$ | 3A       | $1.77 \pm 0.04$    | $-0.043 \pm 0.005$ |

## S2: Screening of suitable phenolic molecules susceptible of electrophilic attack.

The potential screening of suitable phenolic molecules susceptible of electrophilic attack is reported in **Table S2**.

**Table S2:** Electrophilic attack susceptible phenolic substances screening in phosphate buffer 0.5 M pH 6.5.

| Reactant                  | Oxidation peak potential<br>vs SCE (V) | Observation (pH 6.5)                         |
|---------------------------|----------------------------------------|----------------------------------------------|
| Phenol                    | -                                      | Direct oxidation,<br>polymerization products |
| 4-nitrophenol             | ~ 0.89                                 | Probable polymerization                      |
| Resorcinol                | ~ 0.7                                  | Potential not high enough                    |
| 5-sulfosalicylic acid     | ~ 0.9                                  | Can be used                                  |
| Benzoic acid              | ~ 0.93                                 | Very little, overlapped with<br>iodate peak  |
| 5-aminoisophthalic acid   | ~ 0.82                                 | Can be used                                  |
| 5-hydroxyisophthalic acid | ~ 0.83                                 | Can be used                                  |
| 3-hydroxybenzyl alcohol   | ~ 0.65                                 | Potential not high enough                    |

## S3: Electrosynthesis current drop in the case of 5-hydroxyisophthalic acid.

Average current drop of 5-hydroxyisophthalic acid in the case of HIO (**Table S3**) and I<sub>2</sub> (**Table S4**) production are below reported.

**Table S3:** Report of peak current values and current drop of 5-hydroxyisophthalic acid peak for different iodination (iodinating agent: HIO) at the start and at the theoretical end of the reaction.

| HIO Sample | t <sub>0</sub> peak current<br>(j / mA cm <sup>-2</sup> ) | TE peak current<br>(j / mA cm <sup>-2</sup> ) | Current drop<br>(%) |
|------------|-----------------------------------------------------------|-----------------------------------------------|---------------------|
| 1          | 0.3287                                                    | 0.1786                                        | 45.7                |
| 2          | 0.2988                                                    | 0.1632                                        | 45.5                |
| 3          | 0.3905                                                    | 0.2247                                        | 42.5                |
| 4          | 0.3963                                                    | 0.2314                                        | 41.6                |
| 5          | 0.3840                                                    | 0.2183                                        | 43.2                |

**Table S4:** Report of peak current values and current drop of 5-hydroxyisophthalic acid peak for different iodination (iodinating agent: I<sub>2</sub>) at the start and at the theoretical end of the reaction.

| I <sub>2</sub> Sample | t <sub>0</sub> peak current<br>(j / mA cm <sup>-2</sup> ) | TE peak current<br>(j / mA cm <sup>-2</sup> ) | Current drop<br>(%) |
|-----------------------|-----------------------------------------------------------|-----------------------------------------------|---------------------|
| 1                     | 0.5727                                                    | 0.3822                                        | 33.3                |
| 2                     | 0.5203                                                    | 0.3276                                        | 37.0                |
| 3                     | 0.3640                                                    | 0.2390                                        | 34.3                |

#### S4: 5-hydroxyisophthalic acid iodination mixture MS analyses

MS analyses of peaks at 1.50 (di-iodinated product), 4.69 (mono-iodinated product) and 5.41 (di-iodinated product) minutes are reported in **Figure S2**, **Figure S3** and **Figure S4**.

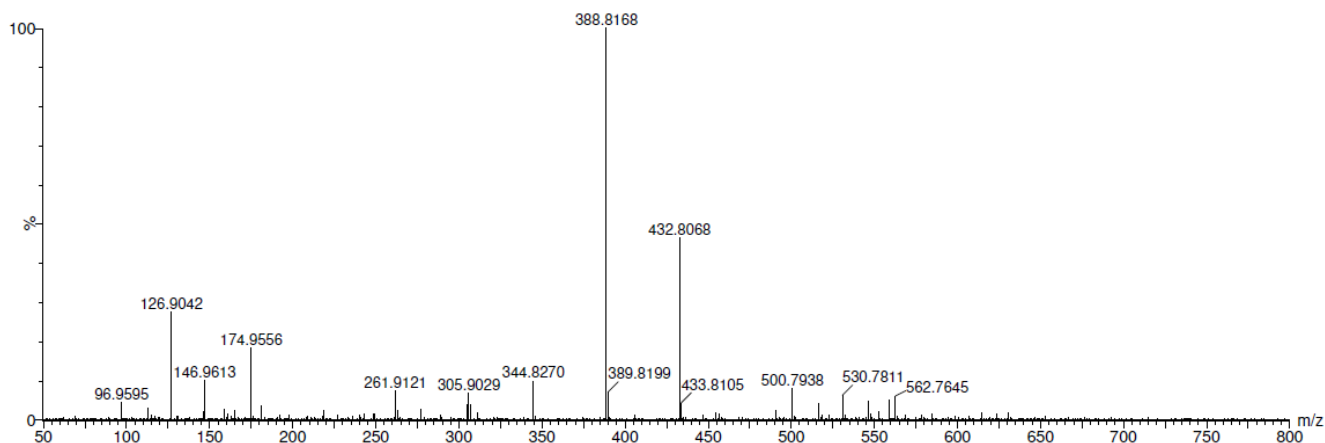

**Figure S2:** MS analysis of the 1.50 minutes peak, corresponding to the di-iodinated product (m/z 432.81). m/z 388.82 is the resulting product of the loss of a  $\text{-COO}^-$  group.

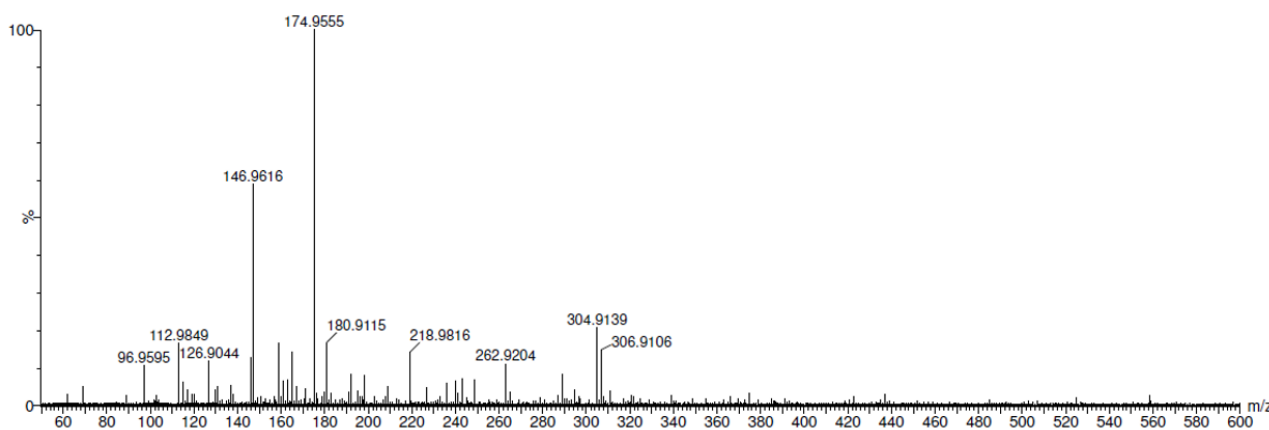

**Figure S3:** MS analysis of the 4.69 minutes peak, corresponding to the mono-iodinated product (m/z 306.91). The ion with m/z 174.96 is referred to the analytical background (it is also present in the blank).

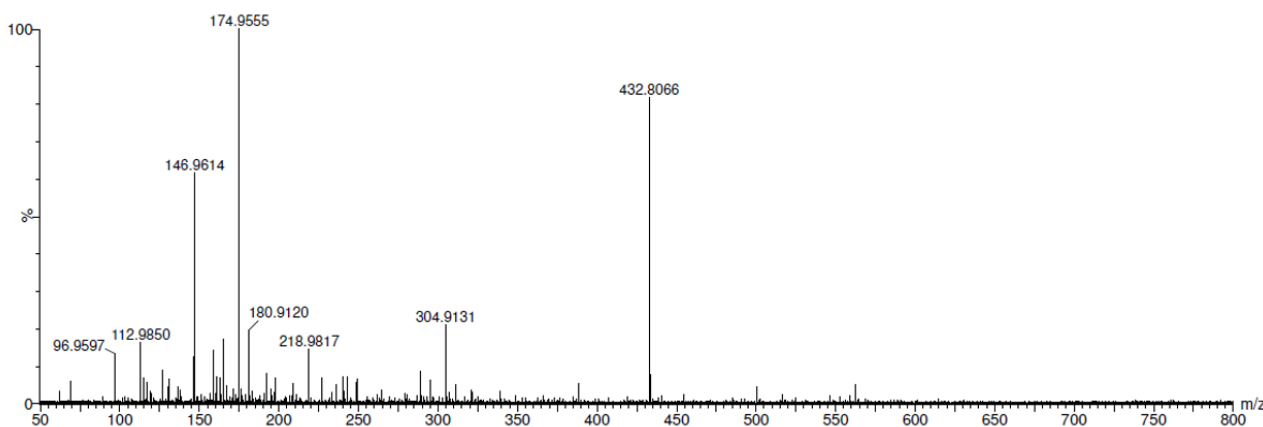

**Figure S4:** MS analysis of the 5.41 minutes peak, corresponding to the di-iodinated product (m/z 432.81). The ion with m/z 174.96 is referred to the analytical background (it is also present in the blank).

### S5: 5-sulfosalicylic acid iodination mixture MS analyses

MS analyses of peaks at 1.06 (5-sulfosalicylic acid), 3.02 (mono-iodinated product) and 5.97 (decarboxylated di-iodinated product) minutes are reported in **Figure S5**, **Figure S6** and **Figure S7**.

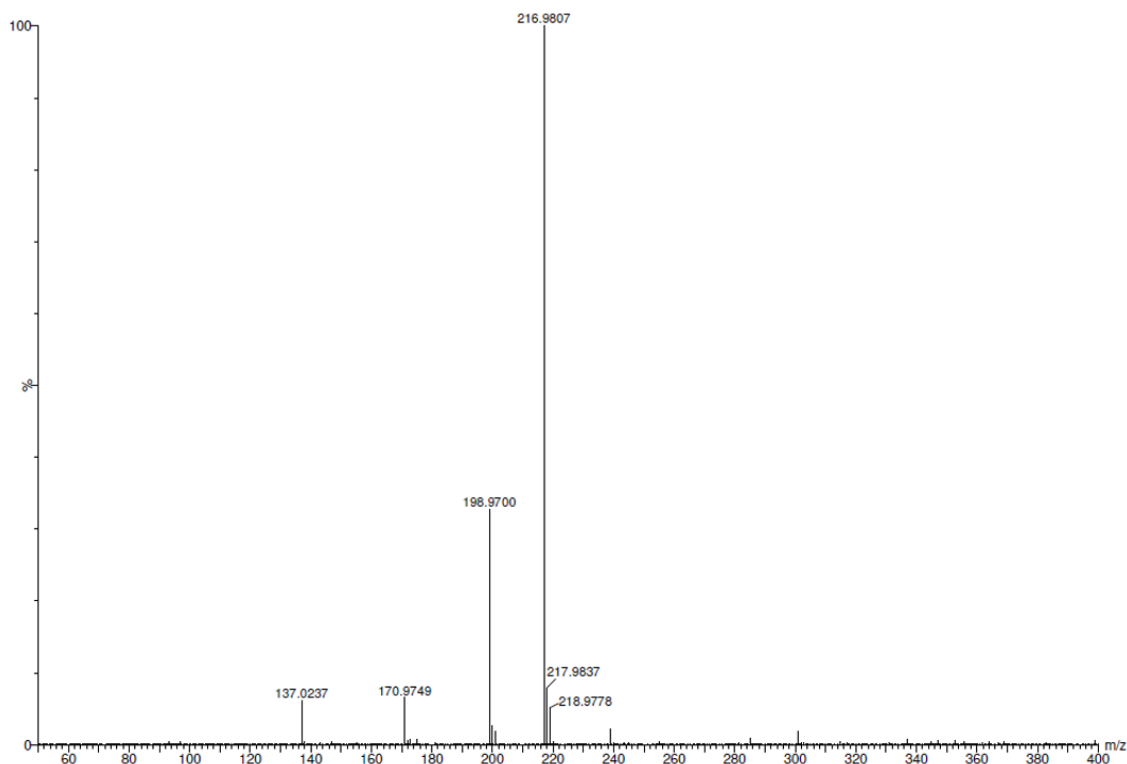

**Figure S5:** MS analysis of the 1.06 minutes peak, corresponding to the 5-sulfosalicylic acid (m/z 216.98).

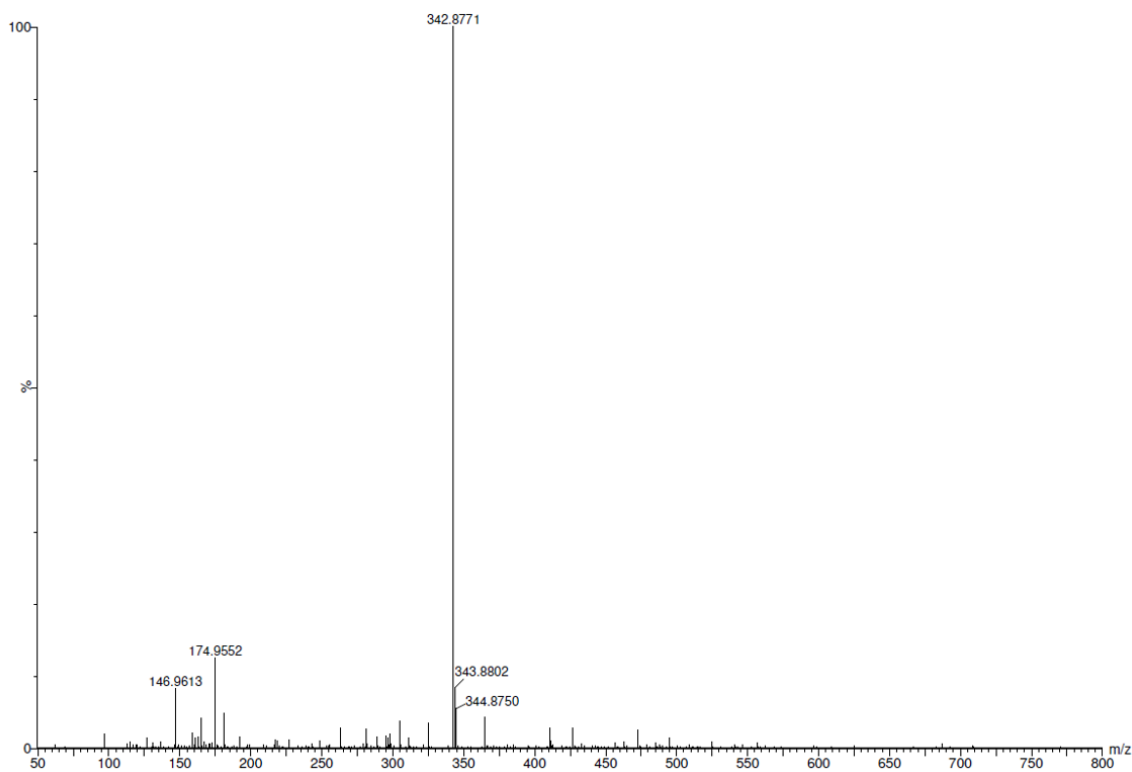

**Figure S6:** MS analysis of the 3.02 minutes peak, corresponding to the mono-iodinated product (m/z 342.88).

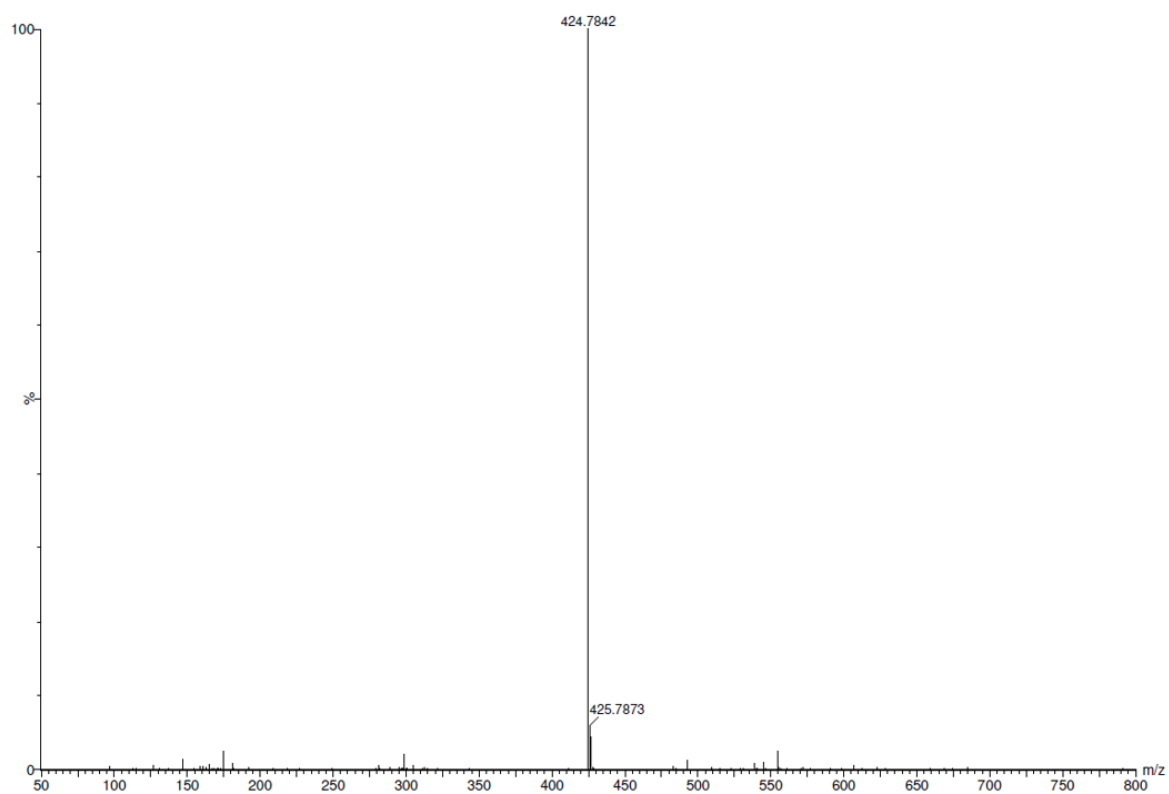

**Figure S7:** MS analysis of the 5.97 minutes peak, corresponding to the decarboxylated di-iodinated product ( $m/z$  424.78).

**S6: NMR spectra of 3,5-diiodo-4-hydroxybenzenesulfonic acid**

5-sulfosalicylic acid iodination product 3,5-diiodo-4-hydroxybenzenesulfonic acid  $^1\text{H}$ , APT, HSQC and HMBC NMR spectra are reported in **Figure S8**, **Figure S9**, **Figure S10** and **Figure S11** respectively.

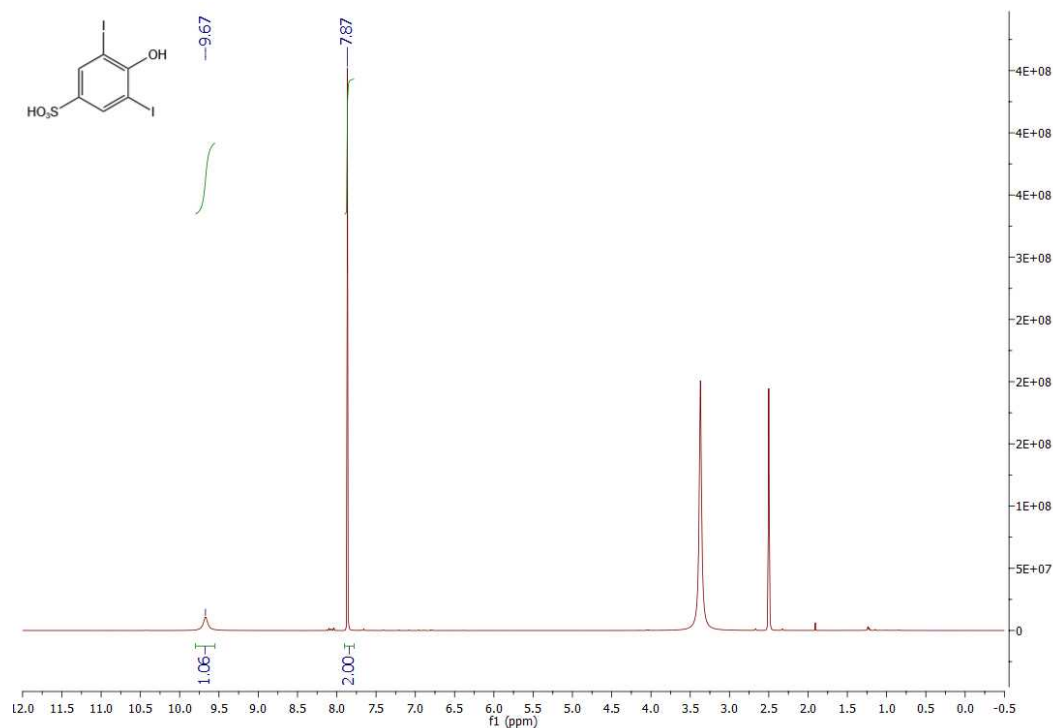

**Figure S8:**  $^1\text{H}$ -NMR spectrum of 3,5-diiodo-4-hydroxybenzenesulfonic acid (decarboxylated di-iodinated product, peak at 5.97 min in UPLC-PDA-HR-MS analysis).  $^1\text{H}$ -NMR (400 MHz,  $\text{DMSO}-d_6$ )  $\delta$  9.67 (s, 1H, OH), 7.87 (s, 2H, H-2 and H-6).

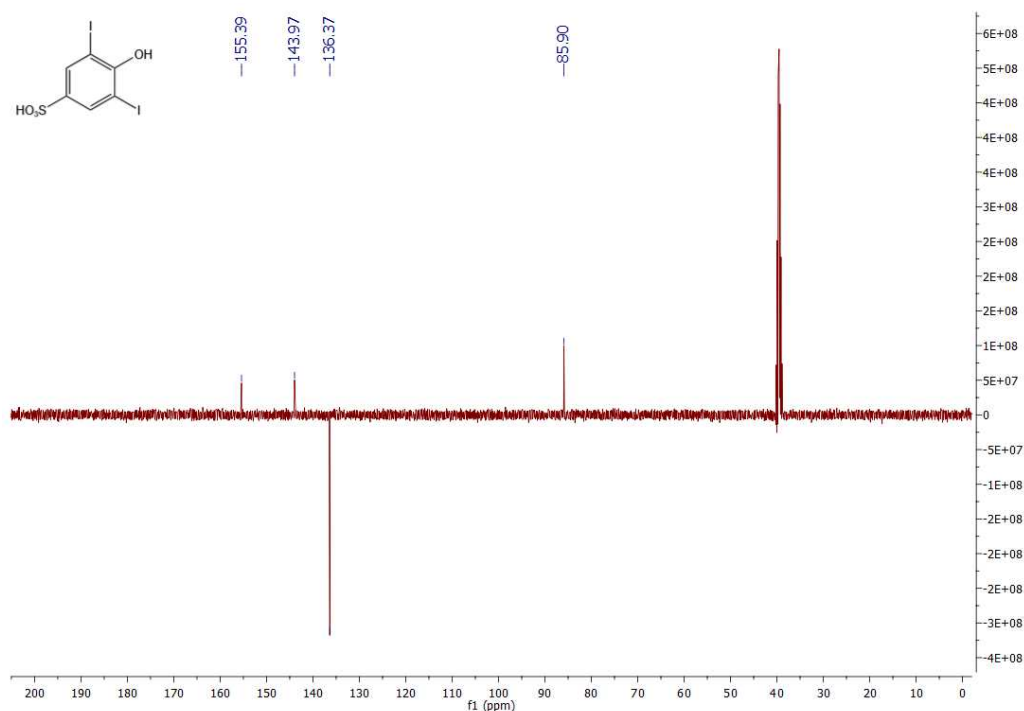

**Figure S9:** APT (Attached Proton Test) NMR spectrum of 3,5-diiodo-4-hydroxybenzenesulfonic acid (decarboxylated di-iodinated product, peak at 5.97 min in UPLC-PDA-HR-MS analysis). Positive peaks are secondary and quaternary carbons, negative peaks are primary and tertiary carbons.  $^{13}\text{C}$ -NMR (101 MHz,  $\text{DMSO}-d_6$ )  $\delta$  155.39 (C-4), 143.97 (C-1), 136.37 (C-2, C-6) and 85.90 (C-3, C-5).

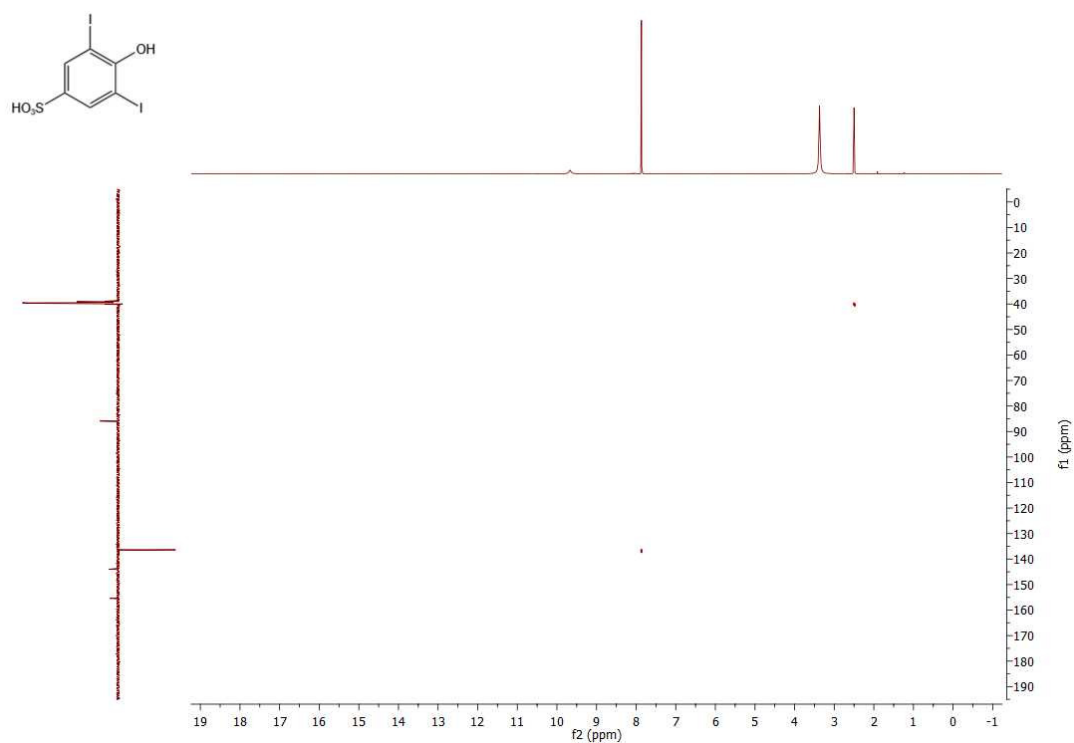

**Figure S10:** HSQC NMR (Heteronuclear Single Quantum Correlation) spectrum of 3,5-diiodo-4-hydroxybenzenesulfonic acid (decarboxylated di-iodinated product, peak at 5.97 min in UPLC-PDA-HR-MS analysis).

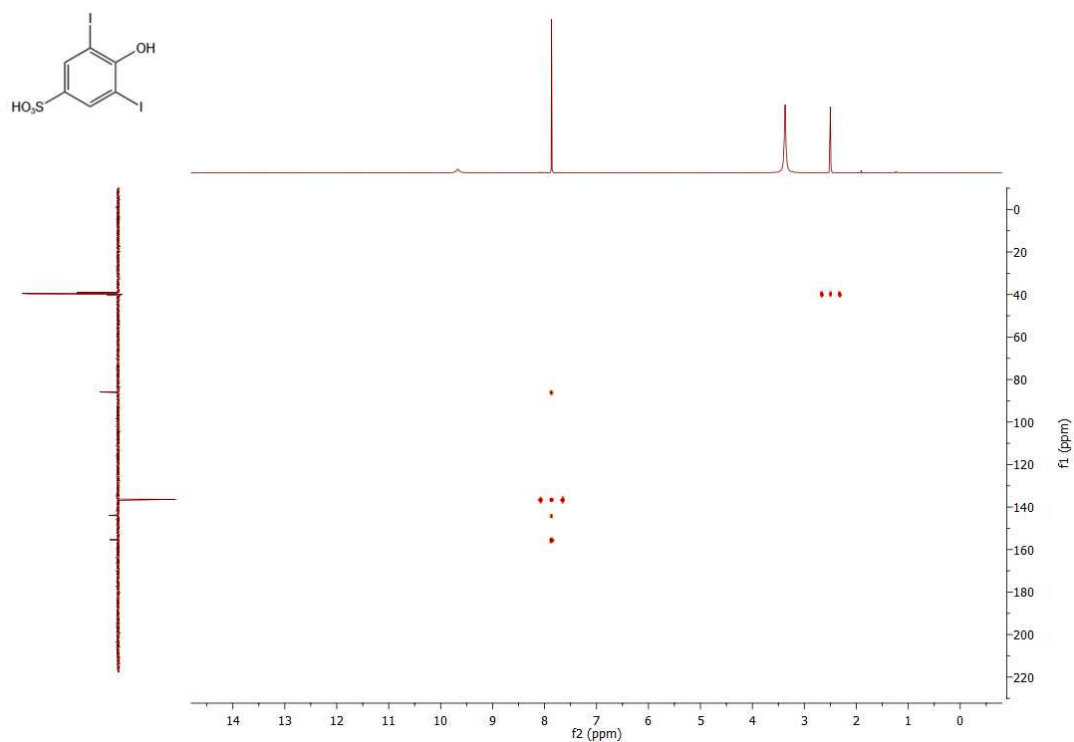

**Figure S11:** HMBC NMR (Heteronuclear Multiple Bond Correlation) spectrum of 3,5-diiodo-4-hydroxybenzenesulfonic acid (decarboxylated di-iodinated product, peak at 5.97 min in UPLC-PDA-HR-MS analysis).



### S7: Experimental set-up for electroiodination

Experimental set-up for electroiodination of 5-hydroxyisophthalic acid and 5-sulfosalicylic acid 15 mM.

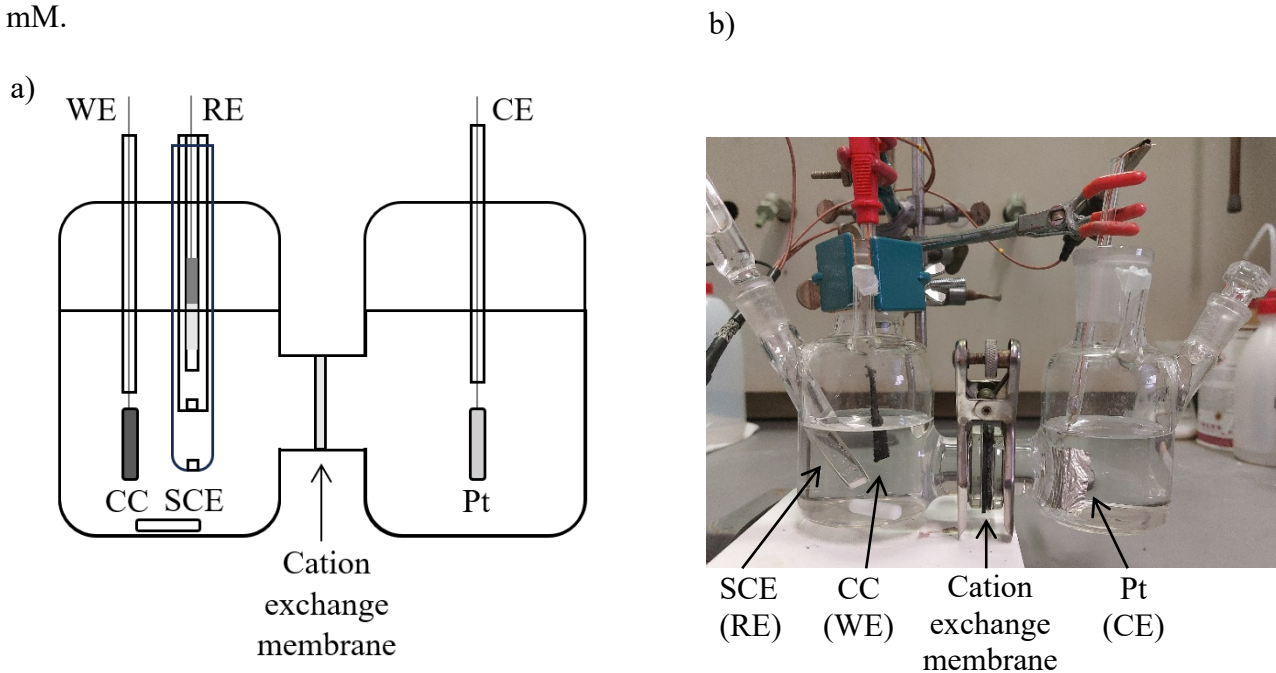

**Figure S12:** a) scheme and b) picture of the divided cell for electrosynthesis of 5-hydroxyisophthalic acid and 5-sulfosalicylic acid 15 mM. WE= working electrode, RE= reference electrode (equipped with a  $\text{KNO}_3$  1 M double salt bridge), CE= counter electrode, CC= carbon cloth, SCE= saturated calomel electrode.
